# Supplementary material for: Substance and Behavioral Addictions among American Indian and Alaska Native Populations
Source: MDPI journal article supplement (doi:10.3390/ijerph19052974), 2022-03-03
Supplement: s1 [file s1]

**Supplementary Table S1.** Summary Information for Risk Factors Associated with Substance Use Studies.

| Risk Factors      | Author(s)             | Study Aim                                                                                                                                                    | Study Design      | Sample Size | Key Findings                                                                                                                                                                                                                                                                                               | Measures Used |
|-------------------|-----------------------|--------------------------------------------------------------------------------------------------------------------------------------------------------------|-------------------|-------------|------------------------------------------------------------------------------------------------------------------------------------------------------------------------------------------------------------------------------------------------------------------------------------------------------------|---------------|
| Historical Trauma | Brave Heart, 2003     | Review conceptual framework of historical trauma and historical trauma response, discuss measurement of trauma, and innovations to address historical trauma | Review            |             | Deeper study into historical trauma (e.g., prevalence, characteristics is needed). Greater use of historical trauma scales is warranted to increase knowledge. Indigenous practices can inform evidence-based treatments There is also a need to diversity interventions in terms of implementation levels |               |
|                   | Kirmayer et al., 2014 | Compare historical events of massive, organized violence to identify common mechanisms and distinctive features                                              | Review            |             | Historical trauma is complex and experienced differently by diverse populations. Structural problems compound trauma and differ generationally. Understanding historical trauma requires a broad understanding of the multiple factors that contribute to it.                                              |               |
|                   | Gone et al., 2019     | Examine the theoretical foundations of historical trauma among Native Americans                                                                              | Systematic review |             | Several studies reported statistically significant relationships between indicators of historical trauma and adverse health outcomes. Historical trauma can potentially help explain modern day Indigenous health problems and needs further study                                                         |               |

|                          |                                                                                                                             |        |                                                                                                                                                                                                         |
|--------------------------|-----------------------------------------------------------------------------------------------------------------------------|--------|---------------------------------------------------------------------------------------------------------------------------------------------------------------------------------------------------------|
| Brave Heart et al., 2011 | Review the historical trauma framework, research, and current innovations aimed at addressing historical trauma among AIANs | Review | Culturally responsive interventions for grief resolution and trauma are necessary to reduce emotional suffering. Research on the best strategies for this work should be guided by Indigenous people. . |
| Brown-Rice et al., 2013  | Examine the theoretical foundations of historical trauma Among Native Americans                                             | Review | Native Americans experience historical loss symptoms like depression, substance dependence, diabetes, unemployment. Trauma has an intergeneration impact on physiological functioning                   |
| Evans-Campbell, 20008    | Presents a multi-level framework for exploring the impact of historically traumatic events                                  | Review | Key characteristics of historical trauma include widespread collective distress and mourning.. Current life stressors align with the context of historical trauma.                                      |
| Mohatt et al., 2014      | Discuss the connection between historical trauma and present-day experiences                                                | Review | Framing historical trauma as a public narrative puts more emphasis on the development and impact of present-day events and their connection to the past                                                 |
| Morgan & Freeman, 2009   | Examine treatments focused on cultural strengths for Alaska Natives                                                         | Review | Historical and intergenerational trauma are strong contributors to substance use.                                                                                                                       |

|                     |                                                                                                                                                            |                 |                 |                                                                                                                                                                                                                                                                             |                                                                                                                                                                                                                                                                                                                                |
|---------------------|------------------------------------------------------------------------------------------------------------------------------------------------------------|-----------------|-----------------|-----------------------------------------------------------------------------------------------------------------------------------------------------------------------------------------------------------------------------------------------------------------------------|--------------------------------------------------------------------------------------------------------------------------------------------------------------------------------------------------------------------------------------------------------------------------------------------------------------------------------|
| Nutton & Fast, 2015 | Discusses the relationship between historical trauma attributed to colonial policies and rates of substance use among AIAN populations                     | Review          |                 | Historical trauma has been associated with higher rates of substance use among AIANs compared to other racial groups. Decolonizing strategies, identity development, and culturally relevant interventions are needed to mitigate the negative effects of historical trauma |                                                                                                                                                                                                                                                                                                                                |
| Ehlers et al., 2013 | Evaluate the relationship between thoughts of historical loss and its symptoms to current traumatic events, cultural identifications, and mental disorders | Cross-sectional | N=306 AI Adults | Anxiety/affective disorders and substance dependence were correlated with historical loss<br>Participants reported thinking about historical losses and symptoms of distress                                                                                                | <u>Alcoholism:</u><br>Semi-Structured Assessment for the Genetics of Alcoholism (SSAGA)<br><u>Historical loss:</u><br>Historical Loss Scale, Historical Loss Associated Symptoms Scale<br><u>Trauma:</u><br>Stressful-Life-Events Scale<br><u>Cultural Indentification:</u><br>Orthogonal Cultural Identification Scale (OCIS) |

|              |                       |                                                                                                                              |                            |                 |                                                                                                                                                                                                                            | <u>Ethnic Identity:</u><br>Multi-group Ethnic Identity Measure (MEIM)<br><u>Stressful life events:</u> Multicultural Events Schedule for Adolescents (MESA) scale<br><u>Cultural activities:</u> 2 items, "Have you ever participated in a drum circle/sweat lodge"<br><u>Historical trauma:</u> Historical Loss Scale |
|--------------|-----------------------|------------------------------------------------------------------------------------------------------------------------------|----------------------------|-----------------|----------------------------------------------------------------------------------------------------------------------------------------------------------------------------------------------------------------------------|------------------------------------------------------------------------------------------------------------------------------------------------------------------------------------------------------------------------------------------------------------------------------------------------------------------------|
|              | Soto et al., 2015     | Examine the relationship between ethnic identity, participation in cultural activities, and stressful life events to smoking | Cross-sectional            | N=969 AI Youth  | Historical trauma mediated the associations of ethnic identity, cultural activities, and stressful life events with smoking. Stronger ethnic identity predicted greater past-month smoking.                                |                                                                                                                                                                                                                                                                                                                        |
|              | Whitbeck et al., 2004 | Discuss the development of two measures relating to historical trauma among AI individuals                                   | Qualitative (focus groups) | N=24 AI Elders  | The Historical Loss Scale and Historical Loss Associated Symptoms Scale show high internal reliability. Current generations of AI adults have frequent thoughts relating to historical trauma and experience.              | <u>Historical Trauma:</u><br>Historical Loss Scale, Historical Loss Associated Symptoms Scale                                                                                                                                                                                                                          |
|              | Wiechelt et al., 2012 | Examine the impact of historical trauma on substance misuse and family cohesion                                              | Cross-sectional            | N=120 AI Adults | Urban AIs reported experiencing more historical trauma compared to reservation-based AIs. Historical trauma symptoms are associated with past month alcohol use, lifetime use of illicit drugs, and lower family cohesion. | <u>Historical Trauma:</u><br>Historical Loss Scale, Historical Loss Associated Symptoms Scale                                                                                                                                                                                                                          |
| Risk Factors | Author(s)             | Study Aim                                                                                                                    | Study Design               | Sample          | Key Findings                                                                                                                                                                                                               | Measures Used                                                                                                                                                                                                                                                                                                          |

| Sociocultural Risk Factors | McKinley et al., 2021  | Assess alcohol use from a sex-specific wellness approach                                                                                                     | Cross-sectional                 | N = 489 AIAN  | Males have 3 times higher drinking rates compared to females. Positive relationship between alcohol and depressive symptoms.                                                           | Alcohol use (created for the study), Body Mass Index (BMI), Self-rated Abilities for Health Practices Scale, Patient Health Questionnaire- 9                   |
|----------------------------|------------------------|--------------------------------------------------------------------------------------------------------------------------------------------------------------|---------------------------------|---------------|----------------------------------------------------------------------------------------------------------------------------------------------------------------------------------------|----------------------------------------------------------------------------------------------------------------------------------------------------------------|
|                            | Kulis et al., 2006     | Examine the social contexts of AI youth encounters with drug offers and their relationship to substance use                                                  | Cross sectional                 | N=71 AI Youth | <b>Exposure to drug offers through relatives or peers was associated with substance use. For females, exposure through parents was a significant predictor of future substance use</b> | <u>Ecosystemic context of drug use:</u> The Problem Situations Inventory for American Indian Youth                                                             |
|                            | Kulis et al., 2002     | Examine how strength of ethnic identity, multiethnic identity, and other indicators of biculturalism relate to drug use norms of urban AIAN middle schoolers | Cross sectional                 | N=434 AIAN    | Higher levels of ethnic pride and greater academic achievement were positively related to antidrug norm adherence.                                                                     | <u>Drug use norms:</u> 26 item questionnaire developed for the study using factor analysis                                                                     |
|                            | Whitesell et al., 2012 | Study the epidemiology and etiology of substance use among AIANs                                                                                             | Review                          |               | Patterns of substance use are diverse. Alcohol directly impacts physical and mental health                                                                                             |                                                                                                                                                                |
|                            | Campbell et al., 2015  | To assess the acceptability of Therapeutic Education System to address substance use.                                                                        | Cross-sectional (Mixed Methods) | N= 40 AIAN    | Therapeutic Education System was acceptable among this AIAN sample; however, adaptations to AIAN culture could improve adoption.                                                       | Self-report substance use: Timeline Follow-Back method; Cultural/ethnicity: The Scale of Ethnic Experience; Intervention acceptability: Qualitative interviews |
| Risk Factors               | Author(s)              | Study Aim                                                                                                                                                    | Study Design                    | Sample        | Key Findings                                                                                                                                                                           | Measures Used                                                                                                                                                  |

|                         |                         |                                                                                                       |                               |                 |                                                                                                                                                                                                                                                                                         |                                                                                                                                                                                                                                          |
|-------------------------|-------------------------|-------------------------------------------------------------------------------------------------------|-------------------------------|-----------------|-----------------------------------------------------------------------------------------------------------------------------------------------------------------------------------------------------------------------------------------------------------------------------------------|------------------------------------------------------------------------------------------------------------------------------------------------------------------------------------------------------------------------------------------|
|                         | McKinley et al., 2021   | Examine AI alcohol use from a sex-specific wellness approach and identify risk and protective factors | Cross-sectional (qualitative) | N=489 AI Adults | Nicotine dependence significantly associated with SUD. Association between depression and smoking is bi-directional and positive. Strong association between lifetime nicotine dependence and mood/anxiety disorders among AIANs                                                        | Alcohol use disorder: Alcohol Use Disorder and Associated Disabilities Interview Schedule DSM-IV (AUDADIS-IV) Lifetime nicotine dependence: AUDADIS-IV Lifetime and current psychiatric disorders: AUDADIS-IV Data taken from the NESARC |
| Poverty and Environment | Whitesell, et al., 2012 | Describe the epidemiology and etiology of substance use within the AIAN community                     | Review                        |                 | Alcohol impacts both physical and mental health within all cultural groups in AIAN populations. Risk and protective factors span across individual, social, and cultural categories.                                                                                                    |                                                                                                                                                                                                                                          |
|                         | Walters et al., 2002    | Propose a new stress-coping model for AIANs                                                           | Review                        |                 | "Indigenist" perspective incorporates impact of historical trauma and ongoing oppression, rather than the Eurocentric paradigm which focuses on individual pathology. Many AIAN substance use issues are directly related to colonization status and various sources of discrimination. |                                                                                                                                                                                                                                          |

|                          |                                                                                                                           |                       |                                               |                                                                                                                                                                                                                                                                      |                                                                                                                                                                                                                                                                                                                                                                                                                                                                                                                                                                              |
|--------------------------|---------------------------------------------------------------------------------------------------------------------------|-----------------------|-----------------------------------------------|----------------------------------------------------------------------------------------------------------------------------------------------------------------------------------------------------------------------------------------------------------------------|------------------------------------------------------------------------------------------------------------------------------------------------------------------------------------------------------------------------------------------------------------------------------------------------------------------------------------------------------------------------------------------------------------------------------------------------------------------------------------------------------------------------------------------------------------------------------|
| Davis et al., 2016       | Analyze contemporary AI poverty and its roots in geography and labor market opportunities                                 | Labor market analysis | N= 110,644<br>AIAN(American Community Survey) | Tribal-owned casinos reduce poverty, but not significantly enough to compensate for the poverty disparity between AIAN and whites. AIAN poverty persists regardless of labor market opportunities due to history of government-sponsored control and discrimination. | American Indian Poverty: 2011 American Community Survey                                                                                                                                                                                                                                                                                                                                                                                                                                                                                                                      |
| Jones 2008               | Identify features in domestic violence in an AIAN sample and identify needs and barriers to service seeking and delivery. | Observational         | N= 41                                         | Domestic violence may be associated with historical trauma, poverty, drugs, alcohol, and rural isolation.                                                                                                                                                            | Interview guide developed for the study                                                                                                                                                                                                                                                                                                                                                                                                                                                                                                                                      |
| Lafromboise et al., 2006 | Identify the factors that influence resilience for AIAN adolescents                                                       | Cross-sectional       | N=212 Youth                                   | Primary risk factor for future problem behaviors was perceived discrimination. Protective factors include having a supportive mother, perceived community support, and higher levels of enculturation.                                                               | <u>Self-esteem</u> : Tri-Ethnic Center's self-esteem scale<br><u>Enculturation</u> : 20 item scale measuring involvement in traditional activities, identification with AIAN culture, and traditional spiritual involvement<br><u>Identification with AI Culture</u> : American Indian Cultural Identification Scale<br><u>Maternal warmth</u> : 6 item scale<br><u>Community support</u> : 3 item index<br><u>Perceived discrimination</u> : 10 item scale<br><u>Resilience</u> : multi-dimensional construct involving school attitude, academic plans, use of drugs, etc. |

|                       |                                                                                                                  |                                                |                                                                     |                                                                                                                                                                                                                                                                                                                             |                                                                                                                                                                                                                                                                                        |
|-----------------------|------------------------------------------------------------------------------------------------------------------|------------------------------------------------|---------------------------------------------------------------------|-----------------------------------------------------------------------------------------------------------------------------------------------------------------------------------------------------------------------------------------------------------------------------------------------------------------------------|----------------------------------------------------------------------------------------------------------------------------------------------------------------------------------------------------------------------------------------------------------------------------------------|
| Castor et al., 2006   | Examine the health status of AIAN populations served by federally-funded Indian Health organizations             | Cross-sectional                                | N=51 AIAN Health Organizations                                      | AIAN populations are more likely to have a lower socioeconomic status compared to the general population. Large health disparity observed in maternal/child health with AIAN mothers receiving less prenatal care and higher rates of alcohol use.                                                                          | <u>National data:</u> 2000 US Census<br><u>Death certificate:</u> 1990-1999 (National Center for Health Statistics)<br><u>Birth certificate:</u> 1991-2000 (National Center for Health Statistics)<br><u>Infant death/natal-ity:</u> 1995-2000 (National Center for Health Statistics) |
| Szlemko et al., 2006  | Outline the prevalence of alcohol misuse among AIANs, discuss interventions, treatment, and risk factors         | Review                                         |                                                                     | AIAN adults and adolescents have higher rates of alcohol use and fetal alcohol syndrome compared to other U.S. ethnic groups. Risk factors include poverty, gender, family history, peer attitudes, parent monitoring, and acculturation. Culturally specific interventions are most effective.                             |                                                                                                                                                                                                                                                                                        |
| Peterson et al., 2002 | Understand the life experiences and perceived recovery needs of AIAN women in substance abuse treatment programs | Cross-sectional (qualitative and quantitative) | N=9 IHS-Funded Treatment Centers<br>N=52 Staff Members<br>N=60 AIAN | Strongest treatment motivation was to maintain or regain custody of their children. Nearly all women used drugs or alcohol to suppress emotions (e.g., grief, pity, and loneliness). Women reported disliking the strict regimens and rules of treatment programs and cited them as reasons for leaving/avoiding treatment. | History of AOD use, social and behavioral risk factors, and duration of treatment information was obtained from participants' medical records                                                                                                                                          |



|              | LaFromboise et al., 2003 | Review the assessment and treatment of AIAN children and adolescents                                                                | Review                 |        | <p>Increase in suicide and suicide-related behaviors within AIAN communities after colonization.</p> <p>Ecological risk factors include historical trauma, acculturation stress, pervasive poverty, community violence, etc.</p> <p>Individual risk factors include depression, substance abuse, anxiety, stress, psychiatric disorders, etc.</p>                   |               |
|--------------|--------------------------|-------------------------------------------------------------------------------------------------------------------------------------|------------------------|--------|---------------------------------------------------------------------------------------------------------------------------------------------------------------------------------------------------------------------------------------------------------------------------------------------------------------------------------------------------------------------|---------------|
|              | Espel et al., 2015       | Provide background information from studies that examined risk and protective factors or suicide prevention programs for AIAN youth | Annotated bibliography | N=31   | <p>Risk factors for AIAN adolescents include alcohol abuse, suicide clustering, intergenerational trauma, and enculturation.</p> <p>Protective factors for AIAN youth include school experience, caring families, and supportive tribal leaders.</p> <p>Importance of cultural relevance and community involvement in developing prevention/treatment programs.</p> |               |
| Risk Factors | Author(s)                | Study Aim                                                                                                                           | Study Design           | Sample | Key Findings                                                                                                                                                                                                                                                                                                                                                        | Measures Used |

## Biological

|                       |                                                                                                          |                 |                                                                               |                                                                                                                                                                                                                                                                                                                                                                                                                                                                                                            |
|-----------------------|----------------------------------------------------------------------------------------------------------|-----------------|-------------------------------------------------------------------------------|------------------------------------------------------------------------------------------------------------------------------------------------------------------------------------------------------------------------------------------------------------------------------------------------------------------------------------------------------------------------------------------------------------------------------------------------------------------------------------------------------------|
| Beauvais, 1998        | Outline the historical and modern factors that contribute to the high prevalence of alcohol use among AI | Review          |                                                                               | <p>Early demand, lack of regulation, and strong encouragement of alcohol use during colonialism may have contributed to a "tradition" of heavy use.</p> <p>AI youth drink more heavily and experience more negative consequences compared to non-AI peers. Alcohol abuse has greater health consequences for the AI population due to heavier levels of drinking, despite potentially higher rates of abstainers compared to non-AI groups.</p>                                                            |
| Mulligan et al., 2003 | Determine the prevalence of alcohol metabolism enzymes in a sample of AI                                 | Cross-sectional | <p>N=90 AI (clinical interviews)</p> <p>N=499 AI (provided blood samples)</p> | <p>Allelic variants (ADH1B, ALDH2) have been identified as altering alcohol metabolism in humans and providing protection against alcoholism.</p> <p>Neither of the alleles were detected in the study population suggesting an additional genetic factor that increases AI vulnerability to alcohol dependence.</p> <p><u>Alcohol dependence</u>: Schedule for Affective Disorders and Schizophrenia-Lifetime Version (SADS-L) with probes added using the Research Diagnostic Criteria and DSM-III-R</p> |

| Risk Factors | Author(s) | Study Aim | Study Design | Sample | Key Findings | Measures Used |
|--------------|-----------|-----------|--------------|--------|--------------|---------------|
|--------------|-----------|-----------|--------------|--------|--------------|---------------|

|               |                        |                                                                                                                                                                         |                         |                  |                                                                                                                                                                                                                                          |                                                                                                                                                                                                                               |
|---------------|------------------------|-------------------------------------------------------------------------------------------------------------------------------------------------------------------------|-------------------------|------------------|------------------------------------------------------------------------------------------------------------------------------------------------------------------------------------------------------------------------------------------|-------------------------------------------------------------------------------------------------------------------------------------------------------------------------------------------------------------------------------|
| Mental Health | Spillane et al., 2020  | Examine trends in the rates of alcohol-induced deaths among U.S. population sub-groups                                                                                  | Observational           | N=425,045        | Large increases in alcohol-induced mortality were observed among both men and women. Significant increases in mortality were observed among all racial/ethnic groups from 2013 to 2016.                                                  | Death Certificates                                                                                                                                                                                                            |
|               | Beckstead et al., 2015 | Examine pre to post-change of patients in a substance use residential treatment that incorporated Dialectic Behavior Therapy with specific cultural/spiritual practices | Cross-sectional         | N=229 AIAN Youth | 96% of the adolescents either "recovered" or "improved" using clinical significance change criteria. Support for integrating Western and traditional methods of care when addressing SUD and other mental disorders in AIAN adolescents. | Youth Outcome Questionnaire-Self Report (YOQ-SR)                                                                                                                                                                              |
|               | Moghaddam et al., 2014 | Examine the comorbidity between nicotine dependence and psychiatric and SUD among AIANs                                                                                 | Secondary data analysis | N=701 AIAN       | Nicotine dependence significantly associated with SUD. Association between depression and smoking is bidirectional and positive. Strong association between lifetime nicotine dependence and mood/anxiety disorders among AIANs.         | <u>Alcohol use disorder</u> : Alcohol Use Disorder and Associated Disabilities Interview Schedule DSM-IV (AUDADIS-IV) Lifetime nicotine dependence: AUDADIS-IV <u>Lifetime and current psychiatric disorders</u> : AUDADIS-IV |

|                          |                                                                                                             |                 |                                       |                                                                                                                                                                                                                                 |                                                                                                                                                                                                                                                                                                                                                                                               |
|--------------------------|-------------------------------------------------------------------------------------------------------------|-----------------|---------------------------------------|---------------------------------------------------------------------------------------------------------------------------------------------------------------------------------------------------------------------------------|-----------------------------------------------------------------------------------------------------------------------------------------------------------------------------------------------------------------------------------------------------------------------------------------------------------------------------------------------------------------------------------------------|
|                          |                                                                                                             |                 |                                       |                                                                                                                                                                                                                                 | <p><u>Adverse childhood experiences:</u><br/>Ten categories of ACEs</p> <p><u>Mental health conditions:</u> Patient Health Questionnaire (PHQ-2), General Anxiety Disorder scale (GAD-2), Primary Care PTSD Screen (PC-PTSD)</p> <p><u>Alcohol and tobacco use:</u> Alcohol Use Disorders Identification Test (AUDIT-C), Behavioral risk Factor Surveillance System questionnaire (BRFSS)</p> |
| Warne et al., 2017       | Assess the prevalence of ACEs and their association with behavioral health in AIAN and non-AIAN populations | Cross-sectional | N=7,675 survey respondents; 516 AIANs | AIANs had a higher prevalence of abuse, neglect, and household dysfunction compared to non-AIANs. For all groups, having six or more ACEs increased the risks of depression, PTSD, anxiety, severe alcohol misuse, and smoking. |                                                                                                                                                                                                                                                                                                                                                                                               |
| Brave Heart et al., 2016 | Explain historical trauma theory and offer specific Native examples of the historical trauma response       | Review          |                                       | Modern psychosocial problems of Native people should be viewed within the context of historically traumatic losses<br>•Quality of parenting is a large risk/protective factor for substance use                                 |                                                                                                                                                                                                                                                                                                                                                                                               |
| Manson et al., 2000      | Summarize data on mental health needs and mental health care of AIANs                                       | Review          |                                       | Limited service utilization observed for AIANs and other social minorities experiencing mental health disorders. Suicide is more common among male AIAN adolescents,                                                            |                                                                                                                                                                                                                                                                                                                                                                                               |

|                      |                                                                                                             |                                      |                            |                                                                                                                                                                                                                                                                                                                       |                                                                                                                                                                                                                                                                                                                                                                                                                                                                                                                                                                                 |
|----------------------|-------------------------------------------------------------------------------------------------------------|--------------------------------------|----------------------------|-----------------------------------------------------------------------------------------------------------------------------------------------------------------------------------------------------------------------------------------------------------------------------------------------------------------------|---------------------------------------------------------------------------------------------------------------------------------------------------------------------------------------------------------------------------------------------------------------------------------------------------------------------------------------------------------------------------------------------------------------------------------------------------------------------------------------------------------------------------------------------------------------------------------|
| Baldwin et al., 2011 | Investigate risk and protective factors related to alcohol and drug use among American Indian youth         | Cross-sectional                      | N total=221 AI Youth       | <p>Relationship between stressful life events and depressed mood, substance use, and other risky behaviors</p> <p>No direct relationship between cultural identity and substance abuse/cultural identity as protective</p> <p>Strong relationship between AI identification and protective family/peer influences</p> | <p>Age</p> <p><u>Stressful life events</u>: 12 item scale ("did these events happen to you")</p> <p><u>Social support</u>: Multidimensional Scale of Perceived Social Support</p> <p><u>Protective family and peer influence</u></p> <p><u>Native American identity</u>: Orthogonal cultural identification scale</p> <p><u>White/Anglo identity</u>: Orthogonal cultural identification scale</p> <p><u>Depressed mood</u>: CES-D</p> <p><u>Substance use</u>: Tri-Ethnic Center for Prevention</p> <p><u>Risky behavior</u>: questions adapted from Alexander et al. 1995</p> |
| Eitle et al., 2014   | Examine the role of coping strategies in moderating the stress-substance use association for AI adolescents | Cross-sectional (qualitative survey) | N=568 Youth (White and AI) | <p>Problem-focused coping strategies were protective for substance use among both white and AI respondents</p> <p>Self distraction, an avoidant coping strategy, was associated with increased risk of marijuana use for AI adolescents but not other racial minority groups</p>                                      | <p><u>Coping measures</u>: Brief COPE</p> <p><u>Recent life events</u>: 26 items, "has this happened to you in the past year"</p> <p><u>Chronic strains</u>: 10 items capturing stressful conditions related to parents/school/relationships/general</p>                                                                                                                                                                                                                                                                                                                        |

| Risk Factors      | Author(s)              | Study Aim                                                                                                                                    | Study Design                                   | Sample                                          | Key Findings                                                                                                                                                                                                                                                                                                                                                                                                                                                     | Measures Used                                                                                                                                                                                                                                                                                                                                                      |
|-------------------|------------------------|----------------------------------------------------------------------------------------------------------------------------------------------|------------------------------------------------|-------------------------------------------------|------------------------------------------------------------------------------------------------------------------------------------------------------------------------------------------------------------------------------------------------------------------------------------------------------------------------------------------------------------------------------------------------------------------------------------------------------------------|--------------------------------------------------------------------------------------------------------------------------------------------------------------------------------------------------------------------------------------------------------------------------------------------------------------------------------------------------------------------|
| Polysubstance Use | Rieckmann et al., 2012 | Examine substance use, mental health disorders, and treatment needs for AIANs with SUD                                                       | Cross-sectional (qualitative and quantitative) | N=74 urban AIAN<br>N=121 reservation-based AIAN | Urban AIANs more likely to report employment problems, polysubstance use, and history of abuse<br>Reservation-based AIANs reported having more severe medical problems and prevalence of psychiatric problems                                                                                                                                                                                                                                                    | <u>Addiction</u> : Addiction Severity Index (ASI)                                                                                                                                                                                                                                                                                                                  |
|                   | O'Connell et al., 2006 | Define patterns of alcohol use among two AIAN communities and examine associations between alcohol use and other indicators of health status | Secondary data analysis (quantitative)         | N=1287 AI Adults                                | Drinkers in the highest risk category for alcohol dependence were more likely to report drug use disorders, mood/anxiety disorders, alcohol-related physical disorders, and lower quality of life<br>High-quantity, yet low frequency pattern of drinking identified for AIANs<br>For females, high-quantity, frequent drinking was associated with drug use disorders<br>For males, high-quantity, frequent drinking was associated with mood/anxiety disorders | Alcohol use: quantity and frequency of alcohol drank<br>Alcohol, drug, and other psychiatric disorders:<br>University of Michigan version of the Composite International Diagnostic Interview (UM-CIDI)<br>Physical health problems: self-reported diagnosis of medical conditions<br>Health-related quality of life: Medical Outcomes Study Short Form-36 (SF-36) |

|                     | O'Connell et al., 2007 | Examine childhood characteristics associated with stage of substance use in adulthood in two AI populations | Cross-sectional   | N=2070 AI Adults              | Strong association between experiencing a traumatic event and each stage of substance use<br>Higher level substance use associated with lifetime substance use dependence, other adult psychiatric disorders, poorer physical health, and legal problems  | Stage of substance use: 4 hierarchical stages<br>Traumatic experiences: witnessing trauma, family violence, etc.<br>Conduct problems: list of 12 negative and violent behaviors<br>Substance use: age of initiation |
|---------------------|------------------------|-------------------------------------------------------------------------------------------------------------|-------------------|-------------------------------|-----------------------------------------------------------------------------------------------------------------------------------------------------------------------------------------------------------------------------------------------------------|---------------------------------------------------------------------------------------------------------------------------------------------------------------------------------------------------------------------|
|                     | Whitbeck et al., 2008  | Investigate changes in prevalence rates for mental and substance use disorders for indigenous adolescents   | Longitudinal      | N=651 Indigenous Youth        | Increase in prevalence rates for SUD and conduct disorders from 10-12 years to 13-15 of age<br>AI adolescents had higher overall prevalence rates of lifetime conduct disorders and lifetime substance abuse disorders compared to the general population | Substance abuse disorders: Diagnostic Interview Schedule for Children-Revised (DISC-R)<br>Adult caretaker diagnosis: University of Michigan Composite International Diagnostic Interview (UM-CIDI)                  |
|                     | Dickerson et al., 2009 | Examine comorbidity of nicotine dependence and substance use disorders among AIANs                          | Cross-sectional   | N=480 AI Adults               | Lifetime nicotine dependence was associated with alcohol and drug use disorders, anxiety/affective disorders, PTSD, pathological gambling, and antisocial personality disorder                                                                            | Psychiatric disorders: Quick-Diagnostic Interview Schedule (Q-DIS)<br>Nicotine dependence: Diagnostic and Statistical Manual of Mental Disorders (DSM-IV)                                                           |
| Risk Factors        | Author(s)              | Study Aim                                                                                                   | Study Design      | Sample                        | Key Findings                                                                                                                                                                                                                                              | Measures Used                                                                                                                                                                                                       |
| Family Risk Factors | Burnette et al., 2016  | Review available research on culturally specific risk and protective factors                                | Systematic review | N= 51 studies with AIAN Youth | There is an overlap of risk factors on mental health and substance use which contribute to disparities                                                                                                                                                    |                                                                                                                                                                                                                     |

|                       |                                                                                                                              |                 |                       |                                                                                                                                                                                                                                                                                                                                                                                                |
|-----------------------|------------------------------------------------------------------------------------------------------------------------------|-----------------|-----------------------|------------------------------------------------------------------------------------------------------------------------------------------------------------------------------------------------------------------------------------------------------------------------------------------------------------------------------------------------------------------------------------------------|
| Burnette et al., 2016 | Provide a culturally relevant framework to explain, predict, and prevent violence experienced by AIAN individuals            | Cross-sectional | N=49 Indigenous Women | Individuals who have been affected by violence have experienced familial divisions, absent parents, family substance use, and limited bonding                                                                                                                                                                                                                                                  |
| Unger et al., 2020    | Determine if cultural factors such as spirituality and ethnic identity are associated with substance use in AIAN adolescents | Cross-sectional | N=156 AIAN Youth      | Strong ethnic identity was protective against marijuana, alcohol, and cigarette use. Past-month use of substances: Youth associated with an increased risk of marijuana and cigarette use. Spirituality: Spirituality Scale. Previous use of traditional tobacco for ceremonial purposes was not associated with past-month substance use. Ethnic identity: Multigroup Ethnic Identity Measure |
| Hurdle et al., 2003   | Understand familial influences on substance use by AIAN kinship.                                                             | Cross-sectional | N=19                  | Kinship members exert influence on other family members with regard to high-risk behaviors. Semi-structured interview guide                                                                                                                                                                                                                                                                    |
| Warne et al., 2015    | Discuss health disparities found in AIAN populations and how they relate to various psychosocial influences                  | Review          |                       | Historical trauma, adverse childhood and adult experiences, contribute to chronic disease disparities and poor health outcomes and impact parenting abilities for future generations                                                                                                                                                                                                           |



|                      |                                                                                                                                                                               |                        |                                 |                                                                                                                                                                                                                                                                                                                         |
|----------------------|-------------------------------------------------------------------------------------------------------------------------------------------------------------------------------|------------------------|---------------------------------|-------------------------------------------------------------------------------------------------------------------------------------------------------------------------------------------------------------------------------------------------------------------------------------------------------------------------|
| Olson et al., 2020   | Review literature on substance abuse studies focused on AIAN populations in the context of historical trauma from boarding school experience and loss of family relationships | Systematic review      | N=27 studies                    | Boarding school residents reported a profound loss of cultural identity PTSD, substance use, and grief associated with boarding school attendance<br>Children who attended boarding schools reported few positive parenting experiences and difficulty with identifying with cultural, collectivist values              |
| Felitti et al., 1998 | To examine the relationship between adverse childhood experiences and leading causes of death in adult life                                                                   | Cross-sectional survey | N= 13,494 representative sample | More than 50% of the sample had at least one adverse experience, and 25% reported having more than two of these experiences. A positive relationship between the number of experiences and adult illnesses was observed.<br>Health appraisals including, health history and physical examinations by medical providers. |

**Supplementary Table S2.** Summary of Information for Protective Factors associated with Substance Use Studies.

| Protective Factors | Author(s)             | Study Aim                                                                                                        | Study Design                             | Sample         | Key Findings                                                                                                                                                                                                                                                                                    | Measures Used |
|--------------------|-----------------------|------------------------------------------------------------------------------------------------------------------|------------------------------------------|----------------|-------------------------------------------------------------------------------------------------------------------------------------------------------------------------------------------------------------------------------------------------------------------------------------------------|---------------|
| Community Factors  | Cwik et al., 2019     | Discuss the process of developing and implementing an intervention                                               | Intervention pilot                       | N= 1,400 Youth | Community-based interventions may help teach cultural traditions, belongingness, and cultural identity to AI youth<br>Expertise from Apache Elders can help build interventions for youth                                                                                                       |               |
|                    | Lewton et al., 2000   | Explain how Navajo principles are understood, demonstrated, and elaborated in three different healing traditions | Qualitative (narrative-based interviews) |                | Sa'ah naaghái bik'eh hózh specifies that conditions for health are harmonious with the physical/spiritual world<br>Traditional healing encourages effective engagement, proper family relations, understanding of one's cultural and spiritual histories, and use of kinship to establish bonds |               |
|                    | Moore et al., 2010    | Explore the effects of Native-focused, peer recovery support programs                                            |                                          |                | Firestarter program incorporates indigenous helpers in encouraging and supporting sobriety and wellness for AIAN members<br>Training of local peer leaders helps develop community capacity                                                                                                     |               |
|                    | Whitbeck et al., 2012 | Review literature on current AIAN substance abuse prevention programs                                            | Review                                   |                | There are numerous prevention programs originating from AIAN communities themselves. There might need to be a                                                                                                                                                                                   |               |

|                    |                       |                                                                                                    |                               |                                                  | paradigm shift from adapting European American prevention science programs to creating cultural best practices from AIAN communities |                                                                                                 |
|--------------------|-----------------------|----------------------------------------------------------------------------------------------------|-------------------------------|--------------------------------------------------|--------------------------------------------------------------------------------------------------------------------------------------|-------------------------------------------------------------------------------------------------|
|                    | Park et al., 2012     | Estimate risk differences of overdoses among AIANs                                                 | Cross-sectional               | N= 2,031                                         | U.S. born AIANs have the highest incidence of overdoses                                                                              |                                                                                                 |
|                    | Kirmayer et al., 2011 | Redefine resilience research by incorporating indigenous constructs                                |                               |                                                  | Frame Indigenous constructs in terms of processes that foster resilience and involve individuals, communities, and larger systems    |                                                                                                 |
| Protective Factors | Author(s)             | Study Aim                                                                                          | Study Design                  | Sample                                           | Key Findings                                                                                                                         | Measures Used                                                                                   |
|                    |                       |                                                                                                    |                               |                                                  | Adolescent antisocial behavior:                                                                                                      |                                                                                                 |
|                    |                       |                                                                                                    |                               |                                                  | Adolescent antisocial behaviors and substance use increased over time.                                                               | Teacher Perception of Risk (TRISK; Soberman, 1994)                                              |
|                    |                       |                                                                                                    |                               |                                                  | Positive behavioral engagement decreased.                                                                                            | Substance use: Student Self-Report Survey (SSRS; Dishion & Stormshak, 2001)                     |
| Family Factors     | Wang et al., 2011     | Examine the relationship between family management practices and early adolescent problem behavior | Cross-sectional (qualitative) | N=1,030 Representative sample including AIY-outh | Increases in adolescence associated with diminished parental rule making, knowledge, and support.                                    | Positive behavioral engagement: Social Skills Rating System (Gresham & Elliott, 1990)           |
|                    |                       |                                                                                                    |                               |                                                  | Parental warmth determined the knowledge between parental knowledge and adolescent problem behaviors                                 | Parental rule making: 4 item scale<br>Parental use of positive reinforcement: 6 item assessment |

**Supplementary Table S3.** Summary of Information for Behavioral Addictions.

| Protective Factors | Author(s)                          | Study Aim                                                                                              | Study Design                                      | Sample                             | Key Findings                                                                                                                                                                                                          | Measures Used                                                                                                                                                                                                                                                                                        |
|--------------------|------------------------------------|--------------------------------------------------------------------------------------------------------|---------------------------------------------------|------------------------------------|-----------------------------------------------------------------------------------------------------------------------------------------------------------------------------------------------------------------------|------------------------------------------------------------------------------------------------------------------------------------------------------------------------------------------------------------------------------------------------------------------------------------------------------|
| Gambling           | Cozzetto et al., 1996              | Examine relationship between the increase in tribal-owned casinos and pathological gambling activities | Region Case Study                                 | N = 1,204                          | Tribal sovereignty led to an increase in tribal-owned casinos and high stakes gambling                                                                                                                                |                                                                                                                                                                                                                                                                                                      |
|                    | Volberg et al., 2006               | Assess the scope of problematic gambling in New Mexico                                                 | Technical report<br>Cross-sectional (qualitative) | N=2,850 Total, N=589 AIAN Specific | Larger portion of AIANs have gambled in the past year compared with non-AIANs (73% vs. 67%)<br>Prevalence rate of at-risk, problem and pathological gambling among AIANs in New Mexico is higher than among non-AIANs | Problem gambling: NORC DSM-IV Screen for Gambling Problems (NODS), Canadian Problem Gambling Index (CPGI)                                                                                                                                                                                            |
|                    | Westermeyer et al., 2005           | Examine the prevalence of pathological gambling and its relationship to physical/mental disorders      | Cross-sectional (qualitative)                     | N=1,624 AI and Hispanic Adults.    | Pathological gambling was associated with substance, mood, and antisocial personality disorder<br>AI veterans had a 10% lifetime prevalence of pathological gambling                                                  | Clinical conditions: Quick-Diagnostic Interview Schedule (Q-DIS),<br>Brief Symptom Index (BSI-57),<br>Michigan Assessment-Screening Tool/Alcohol-Drug (MAST/AD),<br>Posttraumatic Stress Checklist (PCL)<br>Lifetime gambling and pathological gambling: Quick-Diagnostic Interview Schedule (Q-DIS) |
|                    | Patterson-Silver Wolf et al., 2014 | Examine the patterns of gambling and alcohol abuse among AIANs                                         | Cross-sectional                                   | N=415 AIANs                        | AIANs have a higher rate of alcohol abuse and the rate of gambling is twice as high as the general population.                                                                                                        | Survey created for this study. Diagnostic Interview Schedule, Canadian Problem Gambling Index, South Oaks                                                                                                                                                                                            |

|                         |                                                                                                                                                        |                                  |               | Gambling Screen,<br>Native American<br>Identity Scale                                                                                                                                                                                                                                                                                                                                                                                                                                     |
|-------------------------|--------------------------------------------------------------------------------------------------------------------------------------------------------|----------------------------------|---------------|-------------------------------------------------------------------------------------------------------------------------------------------------------------------------------------------------------------------------------------------------------------------------------------------------------------------------------------------------------------------------------------------------------------------------------------------------------------------------------------------|
| Dowling et al.,<br>2017 | Identify early risk<br>and protective fac-<br>tors associated<br>with subsequent<br>development of<br>gambling prob-<br>lems longitudi-<br>nally       | Systematic review                | N=23 articles | Individual risk<br>factors for prob-<br>lem gambling in-<br>clude alcohol use<br>frequency, antiso-<br>cial behavior, de-<br>pression, male<br>gender, cannabis<br>use, illicit drug<br>use, impulsivity,<br>number of gam-<br>bling activities,<br>problem gambling<br>severity, sensation<br>seeking, tobacco<br>use, violence, un-<br>dercontrolled tem-<br>perament<br>Protective factors<br>include socio-eco-<br>nomic status, par-<br>ent supervision,<br>and social prob-<br>lems |
| Potenza et al.,<br>2019 | Provide an over-<br>view of gambling<br>disorder, it's prev-<br>alence within the<br>U.S., neurobiol-<br>ogy, and available<br>treatment pro-<br>grams | Review                           |               | Gambling<br>revalence across<br>the U.S. ranges<br>from 0.4% to 0.6%<br>Risk factors in-<br>clude having low<br>levels of formal<br>education, his-<br>tory of trauma,<br>psychopathology,<br>and impulsivity<br>Protective factors<br>include parental<br>supervision and<br>religious attend-<br>ance                                                                                                                                                                                   |
| Volberg et al.,<br>1997 | Compare the liter-<br>ature on gambling<br>and problem gam-<br>bling among in-<br>digenous groups<br>in New Zealand                                    | Cross-sectional<br>(qualitative) | N=3,933       | Gambling-related<br>problems, expend-<br>itures, and in-<br>volvement are<br>higher among in-<br>digenous re-<br>spondents<br>Gambling: Created<br>for the study-<br>asked "have you<br>tried this type of<br>gambling in the<br>past year/6<br>months?", South                                                                                                                                                                                                                           |

|                     | and in North Dakota                                                                                        |                               |                                                                                | compared to non-Indigenous respondents                                                                                                                                                                                                                               | Oaks Gambling Screen                                                                                                                                                                                  |
|---------------------|------------------------------------------------------------------------------------------------------------|-------------------------------|--------------------------------------------------------------------------------|----------------------------------------------------------------------------------------------------------------------------------------------------------------------------------------------------------------------------------------------------------------------|-------------------------------------------------------------------------------------------------------------------------------------------------------------------------------------------------------|
| Welte et al., 2017  | Examine correlates of problem gambling and potential etiology                                              | Cross-sectional (qualitative) | N=2,963 respondents from a telephone survey that was conducted across the U.S. | Males, people of color with less formal education, and those between 31-40 years old had the highest average problem gambling symptoms. Religiosity was associated with less problematic gambling. Impulsivity and depression were associated with problem gambling. | Scale developed for the study by combining the Diagnostic Interview Schedule (DIS), the South Oaks Gambling Screen Revised (SOGS-R) and the Canadian Problem Gambling Index (CPGI)                    |
| Barnes et al., 2017 | Examine gambling risk factors and problem gambling                                                         | Self-report survey            | N total= 3,474 general U.S. population<br>N=549 Native Americans               | Neighborhood disadvantage impacts overall gambling                                                                                                                                                                                                                   | Frequent gambling: defined by frequency of 15 types of gambling<br>Problem gambling: Diagnostic Interview Schedule, South Oaks Gambling Screen, and Canadian Problem Gambling Index                   |
| Dion et al., 2015   | Investigate the link between child sexual abuse, residential school attendance,, and pathological gambling | Cross-sectional               | N=358 AIAN Adults                                                              | Sexual abuse and residential school attendance were associated with pathological gambling                                                                                                                                                                            | Pathological gambling: South Oaks Gambling Screen (SOGS)<br>Child sexual assault: "have you been sexually assaulted before age 18"<br>Residential schooling: "have you attended a residential school" |
| Kong et al., 2016   | Examine the association between problem-gambling                                                           | Secondary data analysis       | N=43,093; N= 679 AIANs (National Epidemiologic Survey on                       | Problem-gambling severity was higher among AIAN adults than                                                                                                                                                                                                          | Axis-I/Axis-II diagnostic categories: Alcohol Use Disorder and                                                                                                                                        |

|                            |                                  |                        |                                                                                                                                                                    |
|----------------------------|----------------------------------|------------------------|--------------------------------------------------------------------------------------------------------------------------------------------------------------------|
| and psychiatric disorders. | Alcohol and Re-lated Conditions) | among Caucasian adults | Associated Disability Interview Schedule-DSM-IV (AUDADIS-IV) Problem-gambling severity was associated with psychiatric disorders in both AIAN and Caucasian adults |
|                            |                                  |                        | Data taken from the National Epidemiological Survey on Alcohol and Related Conditions (NESARC)                                                                     |
